# Supplementary material for: A spot test for direct quantification of acid green 16 adsorbed on a molecularly imprinted polymer through diffuse reflectance measurements
Source: Royal Society of Chemistry journal article supplement (doi:10.1039/d0ay02069a), 2020-12-16
Supplement: d0ay02069a1.pdf [file d0ay02069a1.pdf]

**Spot test for direct quantification of acid green 16 adsorbed on  
molecularly imprinted polymer through diffuse reflectance  
measurements**

Bianca Mortari<sup>a</sup>, Sabir Khan<sup>a,b,c</sup>, Ademair Wong<sup>a</sup>, Maria D.P.T. Sotomayor <sup>a,b</sup>

<sup>a</sup>Institute of Chemistry, São Paulo State University – UNESP, Araraquara - SP, Brazil

<sup>b</sup>National Institute of Alternative Technologies for Detection, Toxicological Evaluation  
& Removal of Micropollutants and Radioactives (INCT-DATREM), SP, Brazil

<sup>c</sup>Laboratory of Physical Chemistry Research, Faculty of Science, National University of  
Engineering, Av. Tupac Amaru 210, Rimac, Lima, Peru.

\*Corresponding author

E-mail address: m.sotomayor@unesp.br

Tel.: +55 16 33016620

## SUPPLEMENTARY MATERIAL

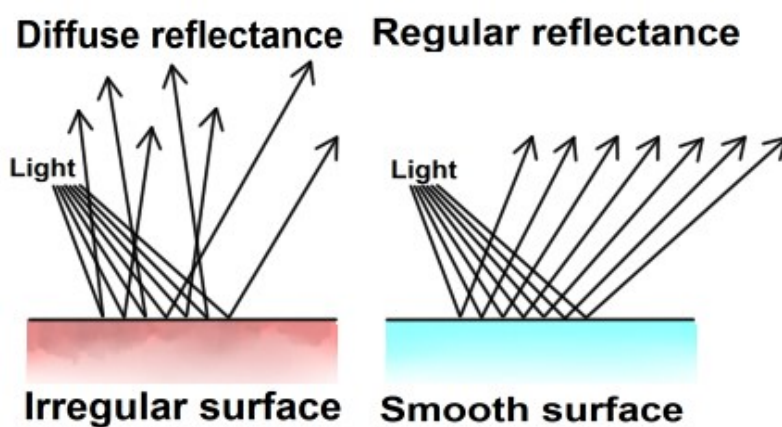

**Figure S1.** Illustration of the two types of reflectance. Source: Own authorship.

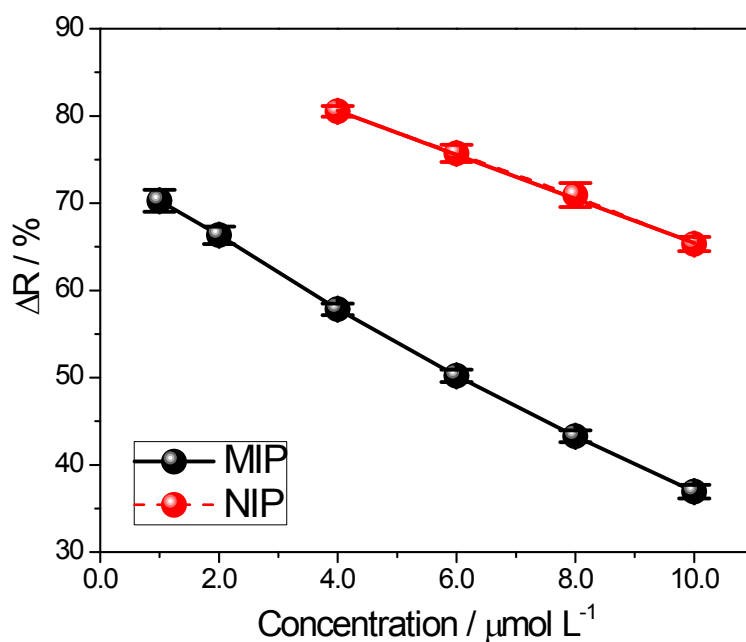

**Figure S2.** Graphs related to the average of 10 reflectance measurements as a function of concentration, along with the standard deviation, for each of the polymers based on the repeatability analysis.

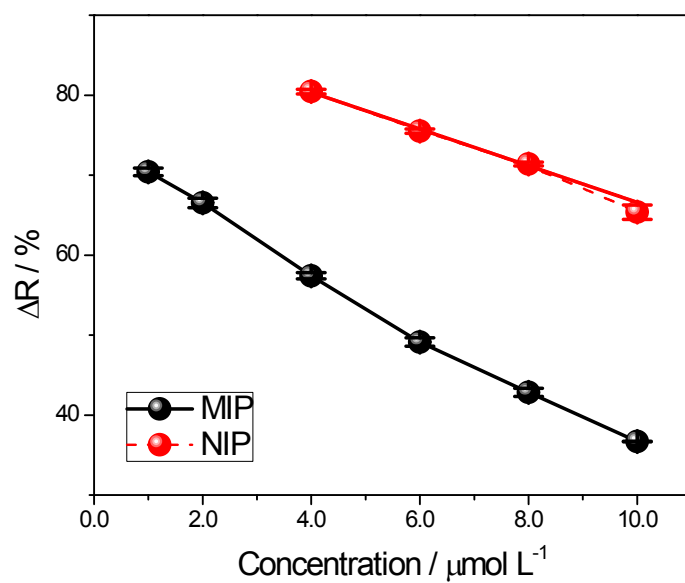

**Figure S3.** Graph of average reflectance as a function of concentration, along with the standard deviation for each of the polymers based on the reproducibility analysis.

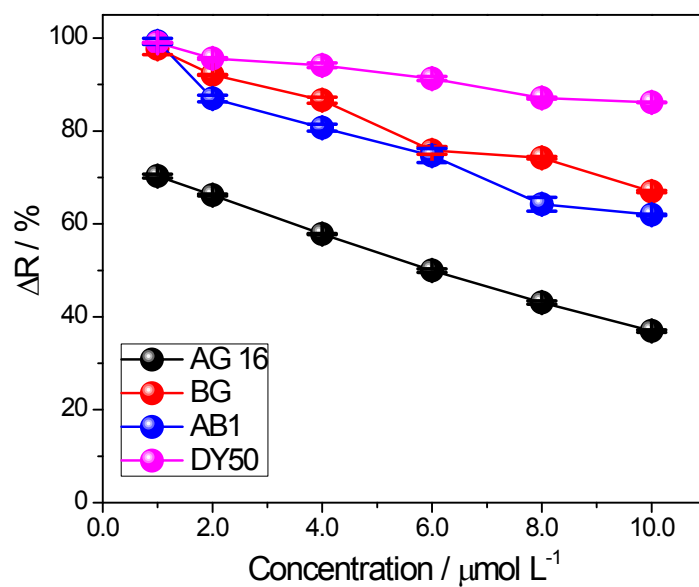

**Figure S4.** Comparison of analytical reflectance curves as a function of MIP concentration with all the dyes investigated.
